# Supplementary material
Source: PubMed Central journal article supplement (PMC5572694)
Supplement: supp_fj.201700115R_Supplemental_Figure1.pdf [file supp_fj.201700115R_Supplemental_Figure1.pdf]

## Supplementary Materials and Methods

**Mice:** *Gad1<sup>ff</sup>* mice were kindly provided by Dr. Jun Ding (Stanford University, Stanford, CA, USA). *TrkB<sup>F616A/F616A</sup>* mice were kindly provided by Dr. David Ginty (Harvard Medical School, MA, USA). *Gad2<sup>CreERT2/+</sup>* (stock number: 010702), and *Rosa(lacZ)* (stock number: 003309) were purchased from The Jackson Laboratories (Bar Harbor, ME, USA).

**Allergen exposure.** For cockroach allergen exposure, mice were given intra-nasally cockroach antigen (CRA) (10 $\mu$ l, 15 $\mu$ g/ml; Cat. #B26, Greer Labs) at P5, P10, and P15. For house dust mite allergen (HDMA) exposure, mice were given intra-nasally HDMA (5 $\mu$ g; Cat. # XPB70D3A2.5, Greer Labs) at P5, P10, and P15 followed by daily intranasal instillations (15 $\mu$ g) between P17-P20. Control pups received PBS intra-nasally. At day 21, mice were sacrificed for blood and lung harvest.

**Airway contraction assay using lung slices.** Individual lung slices were placed in each well of 24-well plates, secured with a ring of nylon mesh together with a metal washer. The plate was imaged with an inverted microscope (DMI6000B; Leica Microsystems, Buffalo Grove, IL, USA). Mid-sized airways with a baseline luminal area between 14,000 $\mu$ m<sup>2</sup> and 20,000 $\mu$ m<sup>2</sup> were selected for imaging. Lung slices were stimulated with increasing concentrations of Mch to induce contraction. Each airway was imaged every minute for a total duration of 35 min. The airway luminal area was measured using NIH Image J and normalized to the baseline value.

## Supplementary Figures

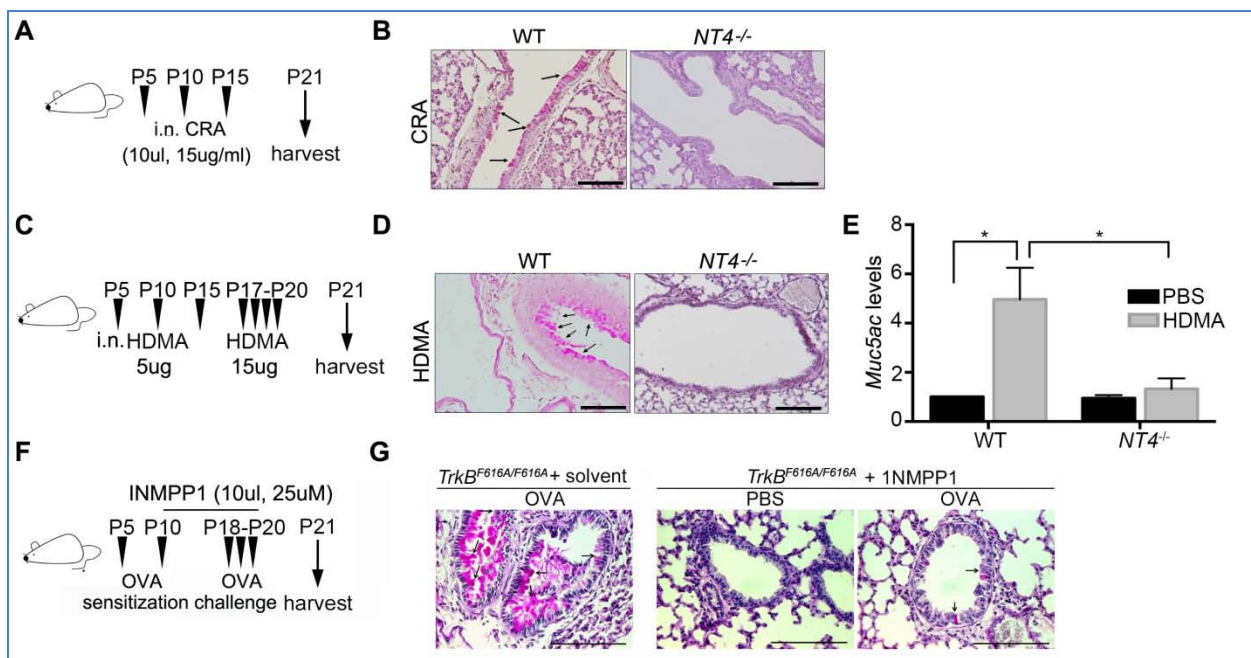

**Supplementary Figure 1.** NT4 and TrkB signaling were required for early life allergen-induced mucus overproduction in mice. (A) Scheme of cockroach allergen (CRA) exposure in early life. Controls received saline. (B) Representative images of PAS staining of lung sections of wild type (WT) and *NT4<sup>-/-</sup>* mice at P21 following CRA exposure. (C) Scheme of house dust mite allergen (HDMA) exposure in early life. Controls received saline. (D) Representative images of PAS staining of lung sections of WT and *NT4<sup>-/-</sup>* mice following HDMA exposure. (E) *Muc5ac* gene expression in WT and *NT4<sup>-/-</sup>* mice following exposure to saline or HDMA were analyzed by qPCR. Data were normalized to *18S* rRNA. \**P*<0.05. (F) Scheme of 1NMPP1 treatment of *TrkB<sup>F616A/F616A</sup>* mice between P10-P20 during OVA exposure. Controls were injected with the solvent for 1NMPP1. (G) Representative images of PAS staining of lung sections of *TrkB<sup>F616A/F616A</sup>* mice with and without 1NMPP1 treatment. Arrows point to mucus<sup>+</sup> cells in airways. Scale bars, 100 $\mu$ m. N=5 for each group.
