# Supplementary material
Source: PubMed Central journal article supplement (PMC5572694)
Supplement: supp_fj.201700115R_Supplemental_Figure2.pdf [file supp_fj.201700115R_Supplemental_Figure2.pdf]

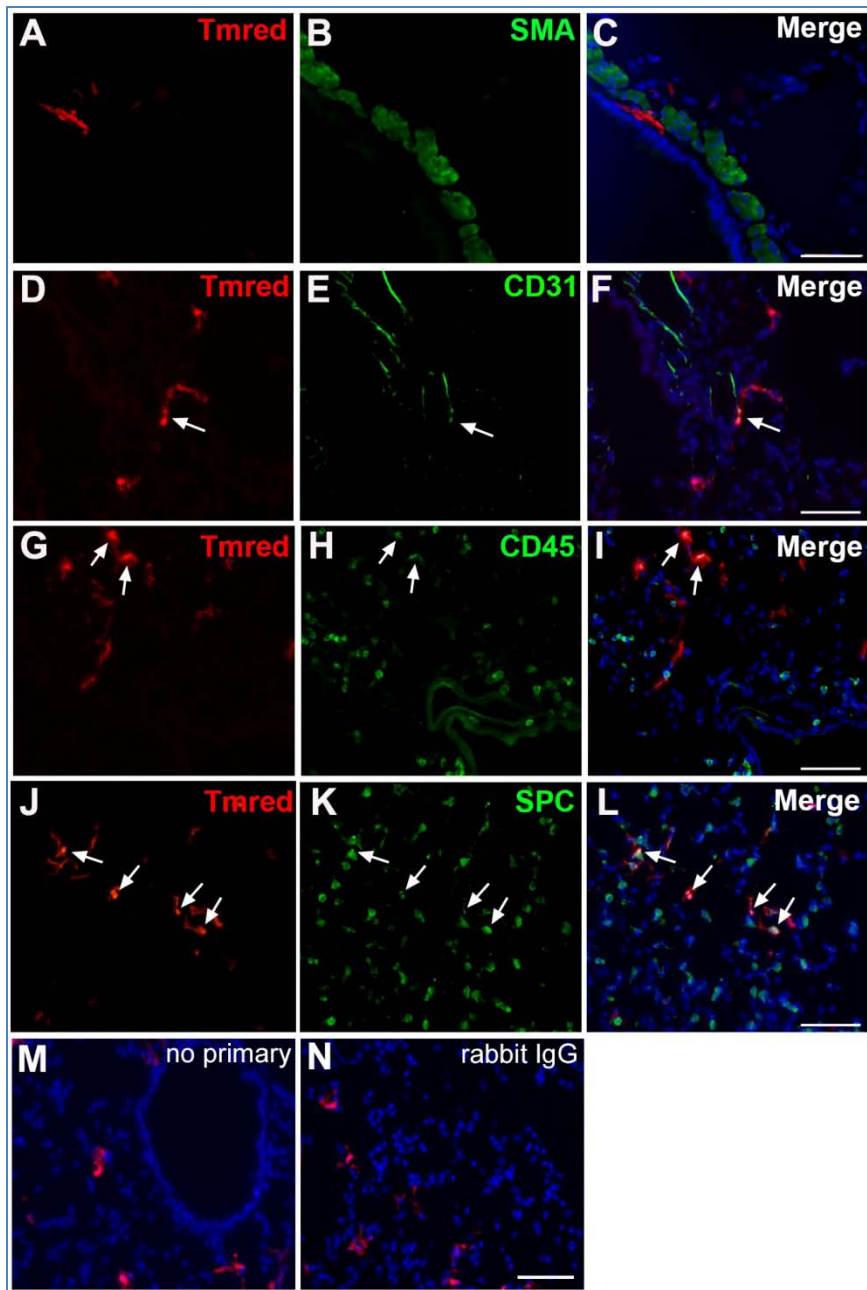

**Supplementary Figure 2.** Lineage tracing of TrkB-expressing cells in postnatal lungs identifies selective TrkB expression by nerves in conducting airways. *TrkB<sup>CreERT2/+</sup>;Rosa(tmRed)* mice received 6 doses of tamoxifen between P5-P7 and P15-P17 before lungs were harvested at P21. Frozen lung sections of

tamoxifen-treated *TrkB<sup>CreERT2/+</sup>;Rosa(tmRed)* mice were collected and stained for markers of airway smooth muscle ( $\alpha$ -SMA) (A-C), endothelial cells (CD31) (D-F), immune cells (CD45) (G-I), and type II alveolar cells (SPC) (J-L). Negative controls include no primary control for directly conjugated antibodies (M) and rabbit IgG isotype for the SPC antibody (N). Arrows mark tmRed<sup>+</sup> cells that also expressed individual cell markers. TmRed was detected only in nerves in the conducting airway. TmRed was also detected in ~5% cells in alveoli. Approximately 87% of these lineage labeled cells in alveoli were SPC<sup>+</sup> type II pneumocytes, 10% were CD31<sup>+</sup> endothelial cells, and 2% were CD45<sup>+</sup> immune cells. Scale bars, 100 $\mu$ m. N=2 mice per group. Primary antibodies included: FITC-conjugated mouse anti- $\alpha$ -smooth muscle actin (SMA) (1:100; clone 1A4, Cat. #F3777, Sigma), FITC-conjugated rat anti-mouse CD45 (1:100, Cat. #553079, BD Pharmingen), FITC-conjugated rat anti-mouse CD31 (1:100, Cat. #BD Pharmingen), rabbit anti-pro-SPC (1:200, Cat. #AB3786, Millipore).
